# Supplementary material for: Cancer-associated MSC drive tumor immune exclusion and resistance to immunotherapy, which can be overcome by Hedgehog inhibition
Source: PubMed Central journal article supplement — Sci Adv. 2021 Nov 12;7(46):eabi5790. doi: 10.1126/sciadv.abi5790 (PMC8589308; doi:10.1126/sciadv.abi5790), 2021-11-12
Supplement: sciadv.abi5790_sm.pdf [file sciadv.abi5790_sm.pdf]

Supplementary Materials for

**Cancer-associated MSC drive tumor immune exclusion and resistance to immunotherapy, which can be overcome by Hedgehog inhibition**

Sandra Cascio, Chelsea Chandler, Linan Zhang, Sarah Sinno, Bingsi Gao, Sayali Onkar, Tullia C. Bruno, Dario A. A. Vignali, Haider Mahdi, Hatice U. Osmanbeyoglu, Anda M. Vlad, Lan G. Coffman, Ronald J. Buckanovich\*

\*Corresponding author. Email: [buckanovichrj@mwri.magee.edu](mailto:buckanovichrj@mwri.magee.edu)

Published 12 November 2021, *Sci. Adv.* 7, eabi5790 (2021)

DOI: [10.1126/sciadv.abi5790](https://doi.org/10.1126/sciadv.abi5790)

**This PDF file includes:**

Figs. S1 to S5

Table S1

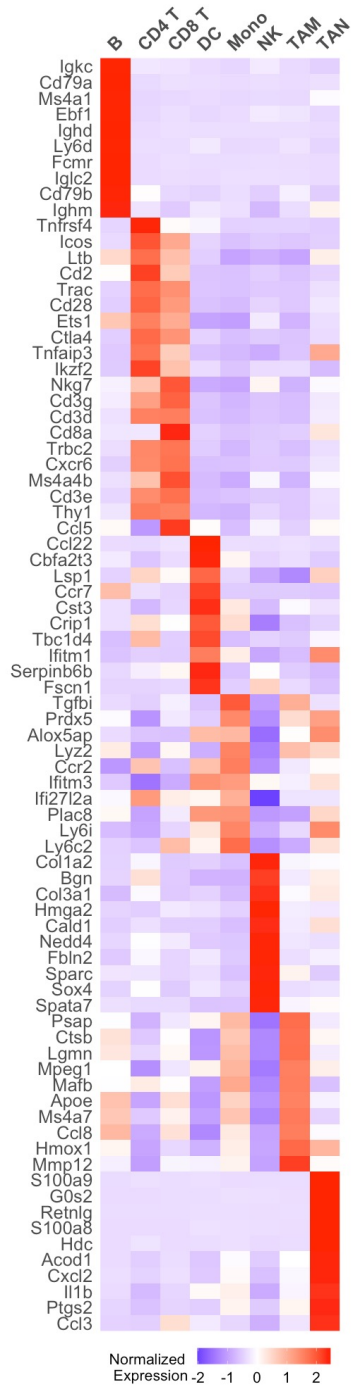

**Fig. S1.** Heatmap displaying normalized expression of top 10 differentially expressed genes in each cell type population.

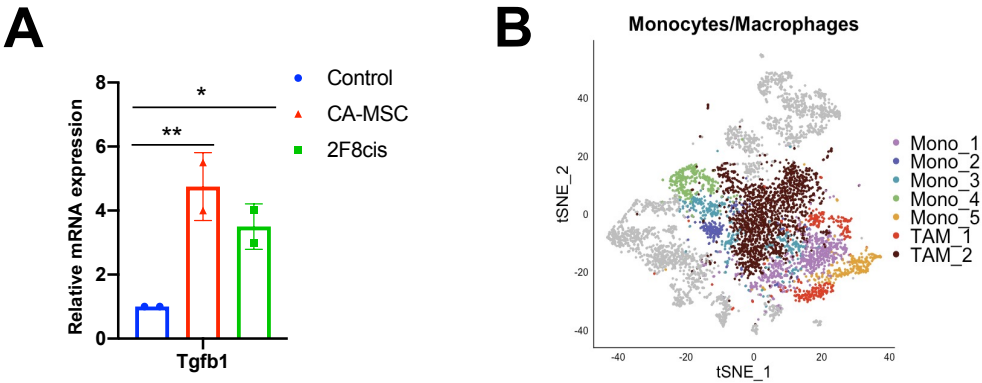

**Fig. S2. Expression of *Tgfb1* gene expression in 2F8cis and CA-MSCs.** **A)** RT-PCR was performed to calculate *Tgfb1* gene expression in CellTrace violet-labeled a-MSCs (CA-MSC) co-cultured with 2F8cis cells (2F8cis) and compared to 2F8cis cells cultured alone (Control). *Gapdh* was used as housekeeping gene. **B)** tSNE scRNAseq plot of monocytes and macrophages specific data from merged data of a-PD-L1-treated tumors.

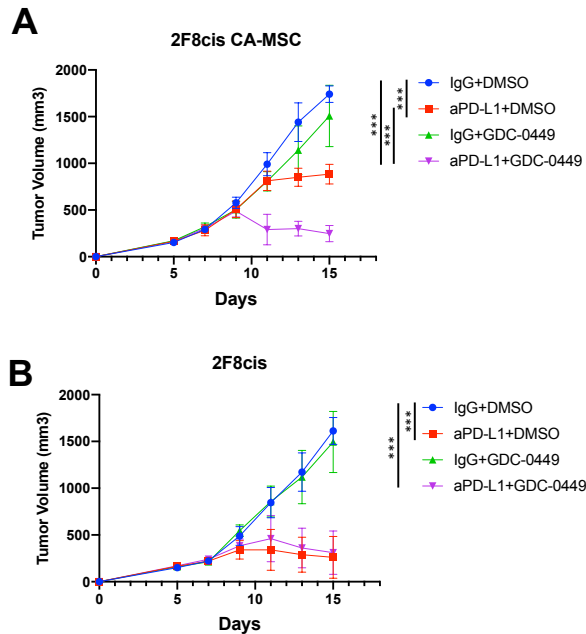

**Fig. S3. GDC-0449 restores anti-PD-L1 therapy in CA-MSC+ tumors. A-B)** Average tumor growth curves of 2F8cis/CA-MSC- (A) and 2F8cis- (B) tumor-bearing mice after receiving the indicated treatments. Statistical significances were calculated using two-way ANOVA. Error bars, SEM \* $p < 0.05$ , \*\*  $p < 0.01$ , \*\*\*  $p < 0.001$ , \*\*\*\* $p < 0.0001$ .

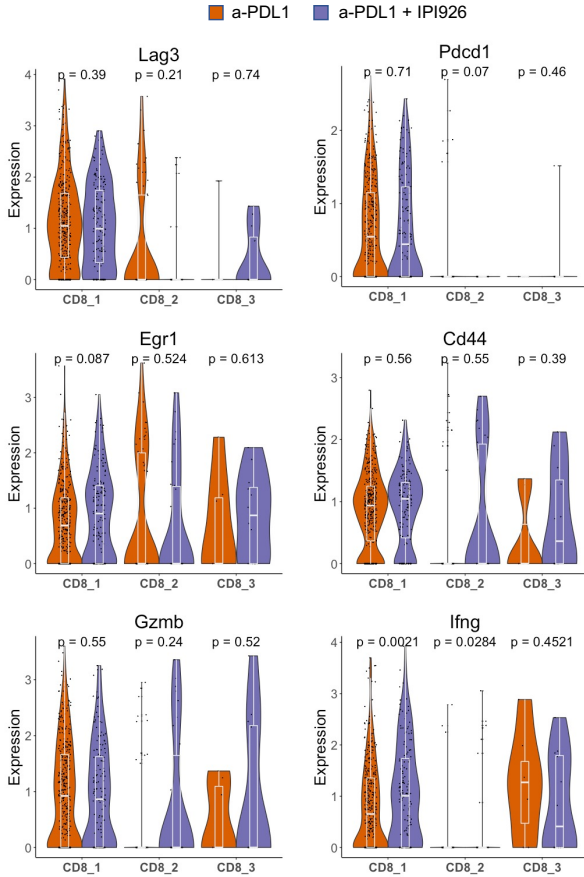

**Fig. S4. Gene expression in CD8 T cells isolated from a-PDL1- and a-PDL1 + IPI-926-treated CA-MSC+ tumors.** Violin plots showing the expression of *Lag3*, *Pcd1*, *Egr1*, *Cd44*, *Gzmb* and *Ifng* in each CD8 T cell cluster of the indicated a-PD-L1- and a-PD-L1 + IPI-926-treated 2F8cis/CA-MSC tumors. Results were analyzed using two-way ANOVA or Wilcoxon sign rank test. Error bars, SEM \*p < 0.05, \*\* p < 0.01, \*\*\* p < 0.001.

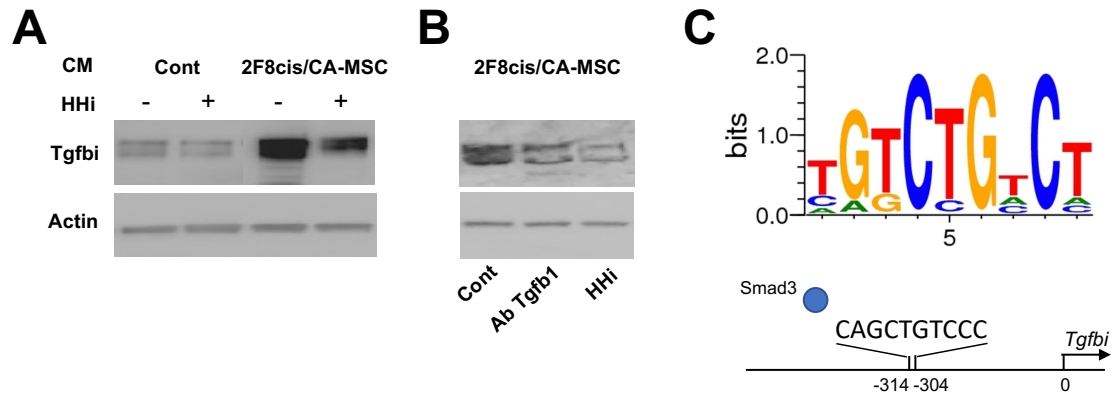

**Fig. S5. CA-MSC-secreted Tgf-b1 modulate Tgfb1 expression in macrophage. A-B)** Western blotting showing the abundance of Tgfb1 in BM-derived macrophages cocultured with the CM of 2F8cis/CA-MSCs pre-treated or not with HHi. BM-derived macrophages cultured in DMEM were used as control (Cont). Actin was used as loading control. **C)** The *Tgfb1* promoter region contains a putative SMAD3-binding site, detected by MotifMap.

**Table S1. Clinical characteristics of PD-1/PD-L1 ICI treated OvCa patients**

| <b>Characteristic</b>                                     | <b>N=14</b> |
|-----------------------------------------------------------|-------------|
| Histology                                                 |             |
| clear cell                                                | 3 (25%)     |
| serous                                                    | 8 (67%)     |
| Serous                                                    | 1 (8.3%)    |
| Unknown                                                   | 2           |
| Stage                                                     |             |
| I                                                         | 1 (7.7%)    |
| II                                                        | 2 (15%)     |
| III                                                       | 5 (38%)     |
| IV                                                        | 5 (38%)     |
| NA                                                        | 1           |
| MSI                                                       |             |
| Stable                                                    | 7 (50%)     |
| NA                                                        | 7 (50%)     |
| Age                                                       | 63 (57, 71) |
| Toxicity                                                  | 6 (46%)     |
| NA                                                        | 1           |
| Resp                                                      |             |
| Prog                                                      | 7 (50%)     |
| Resp                                                      | 4 (29%)     |
| Stable                                                    | 3 (21%)     |
| PFSMonth                                                  | 6 (3, 9)    |
| NA                                                        | 1           |
| OSMonth                                                   | 10 (5, 27)  |
| NA                                                        | 1           |
| Death                                                     | 9 (64%)     |
| <sup>1</sup> Statistics presented: n (%);<br>Median (IQR) |             |
